# Supplementary material for: Molecular signatures of in situ to invasive progression for basal-like breast cancers: An integrated mouse model and human DCIS study
Source: PubMed Central journal article supplement (PMC9293914; doi:10.1038/s41523-022-00450-w), 2022-07-18
Supplement: 41523_2022_450_MOESM10_ESM.pdf [file 41523_2022_450_MOESM10_ESM.pdf]

| Category      | ID     | Name        | Source | p-value  | q-value  | FDR | Hit Count | Count in Query List | Count in Gene | Hit in Query List                                                                                                                                                                                             |
|---------------|--------|-------------|--------|----------|----------|-----|-----------|---------------------|---------------|---------------------------------------------------------------------------------------------------------------------------------------------------------------------------------------------------------------|
| Transcription | M29952 | EZF5_TARGET | MSigDB | 2.30E-19 | 5.86E-11 |     | 30        | 1273                |               | CDCA3, RANGAP1, CENPA, CENPF, KINSTRN, DLGAP5, PRK3, SMC4, HMG1, MCM2, BIRC3, HMG2, HMG3, STMN1, STAT1, CCNA2, PTMS, CDCA2, LUBEZ1, CCNB2, TPX2, MKI67, GINS2, PLSCR2, BUB3, ALDOA, SKA1, TOP2A, KIF22, AURKB |
| Transcription | M29951 | EZF2_TARGET | MSigDB | 7.57E-05 | 2.23E-03 |     | 19        | 1481                |               | CDKN2D, CENPA, INCENP, CENPE, CENPF, HMG1, HMG2, SMC2, CCNA2, CCNB1, KIF20A, SPC24, ARL6IP1, TPX2, OAS1, CDK1, TOP2A, KIF11, AURKB                                                                            |
